# Supplementary material for: Construction of a culture protocol for functional bile canaliculi formation to apply human iPS cell-derived hepatocytes for cholestasis evaluation
Source: Springer Nature journal article supplement (doi:10.1038/s41598-022-19469-x), 2022-09-07
Supplement: MOESM1 [file 41598_2022_19469_MOESM1_ESM-1.pdf]

# Supplemental figure 1

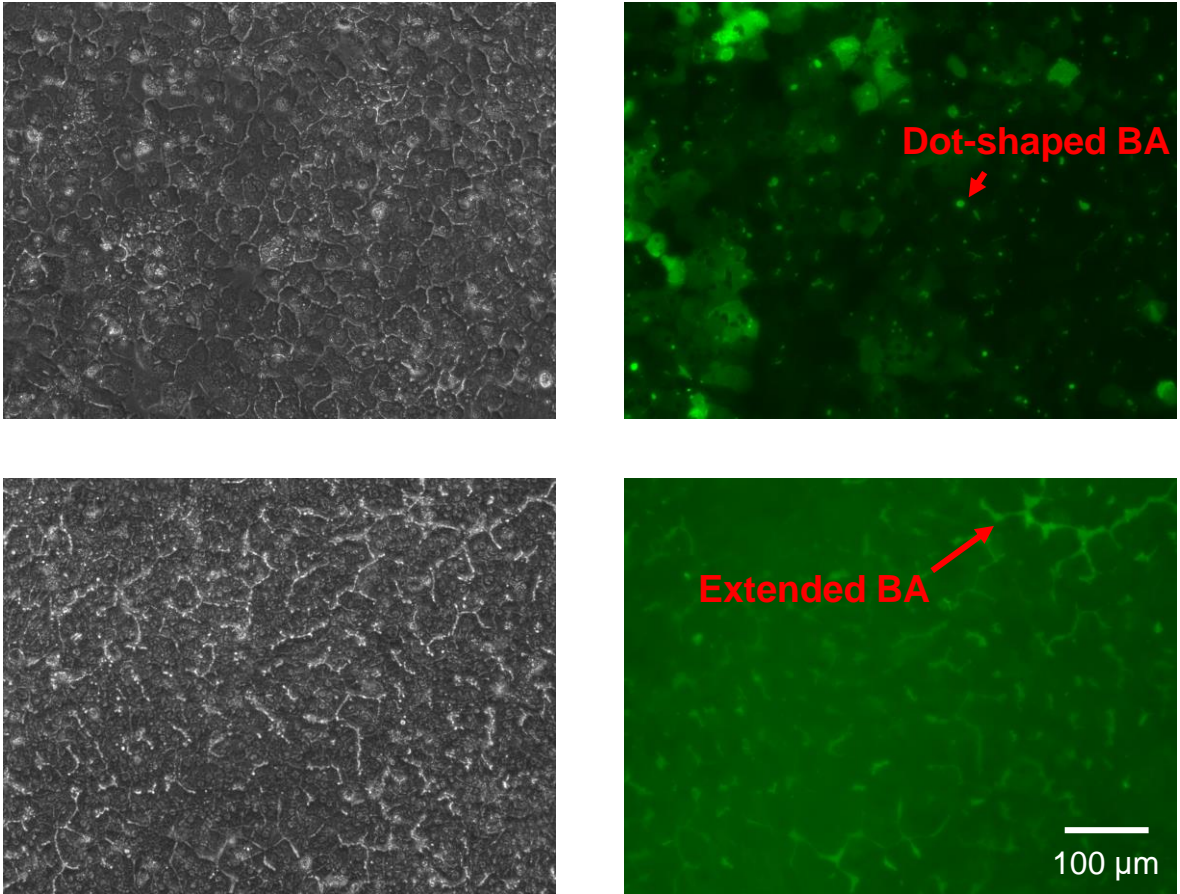

hiPSC-Heps cultured for 8 days according to the manufacturer's protocol (top). hiPSC-Heps cultured for 30 days in a long-term maintenance medium on a collagen-coated culture plate (bottom). The biliary efflux assay was performed using FDA. Phase contrast microscope image (left) and fluorescence image (right). Fluorescence images show fluorescein accumulated in bile canaliculi.

# Supplemental figure 2

A)

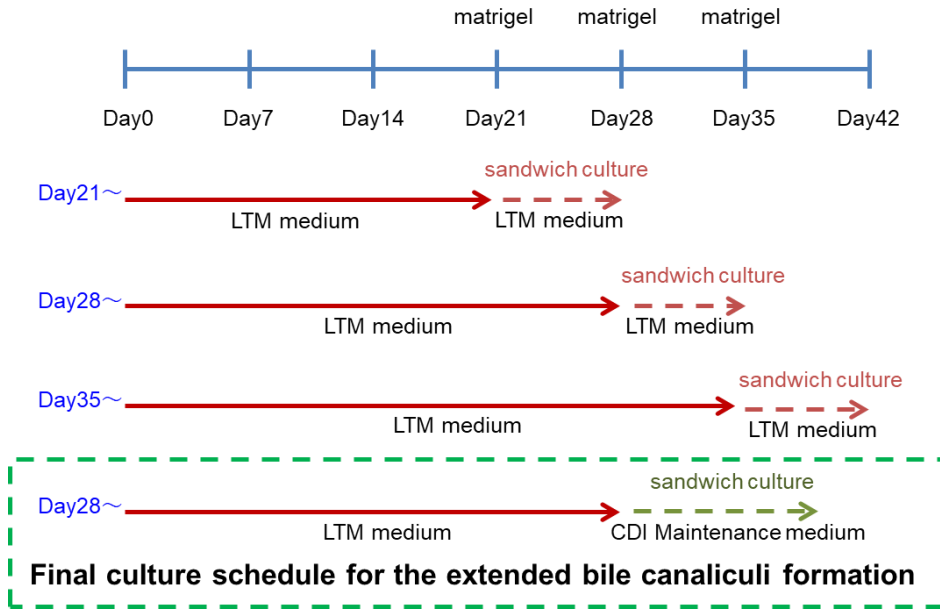

B)

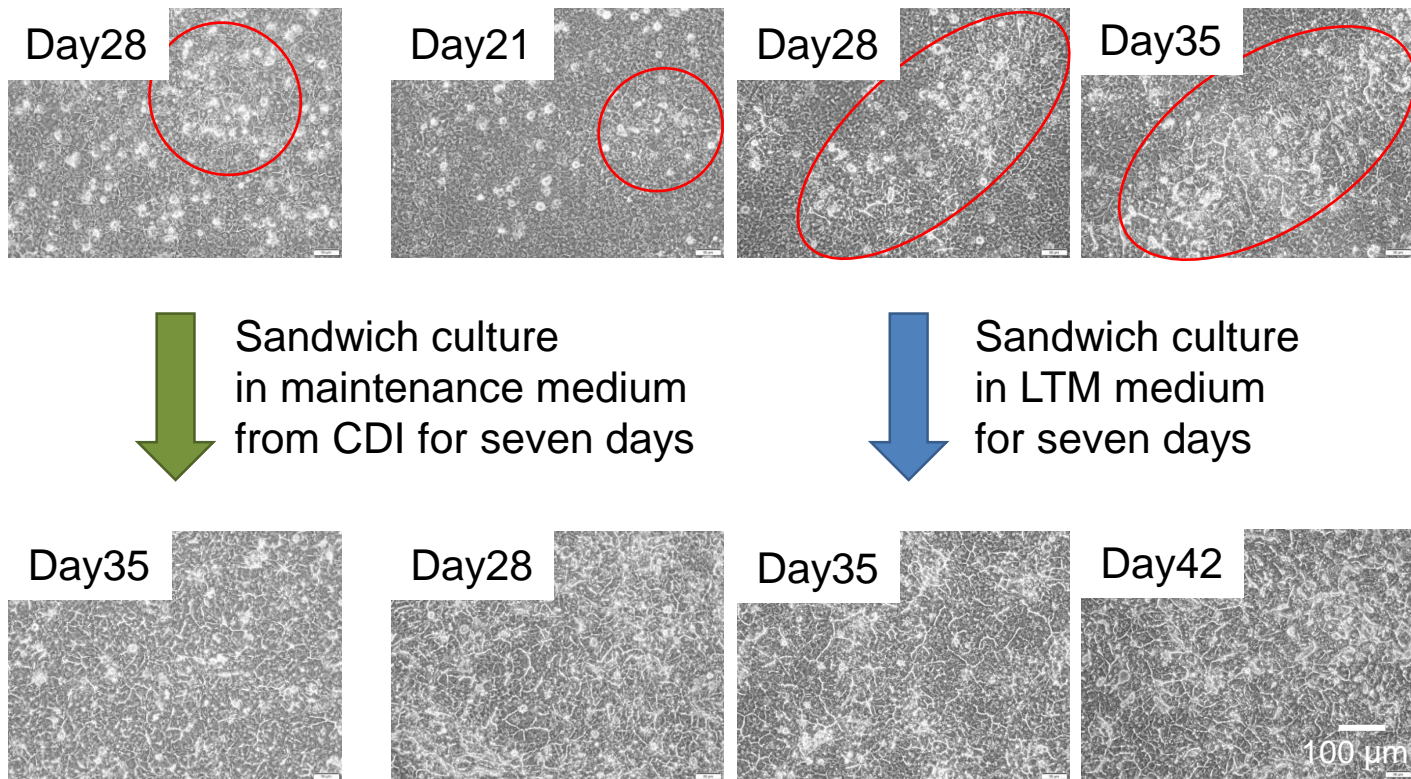

Culture schedule for the extended bile canaliculi and cell morphology before or after sandwich culture in maintenance medium (one on the left) or LTM medium (three on the right). Cell morphology was observed using a phase contrast microscope. The red circles show areas where bile canaliculi were formed before the sandwich culture.

## Supplemental figure 3

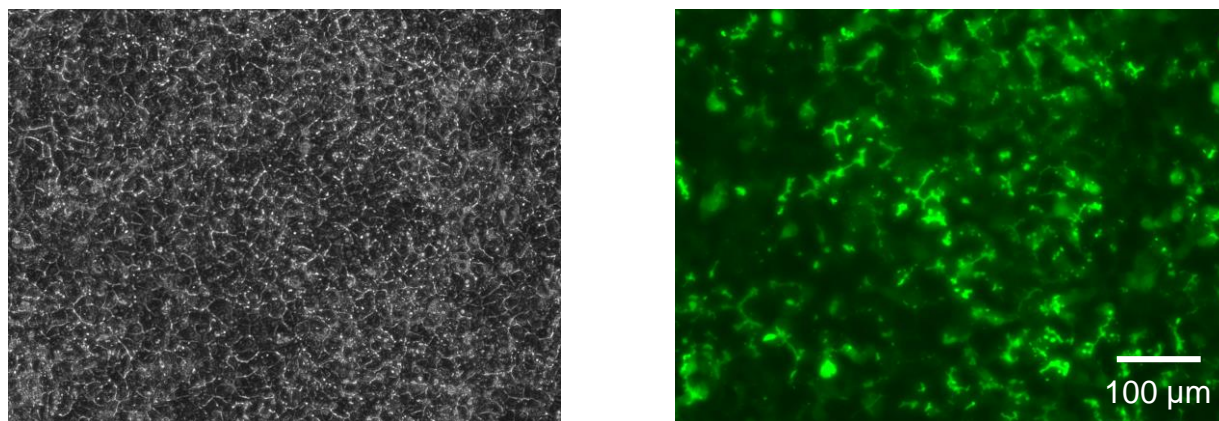

Observation of the bile canaliculi using FDA. hiPSC-Heps were cultured in a LTM medium for 28 days and then, they were sandwich-cultured in an LTM medium for 7 days. The biliary efflux assay was performed using FDA. Phase contrast microscope image (left) and fluorescence image (right) of an area where visualization of the bile canaliculi using FDA was poor. Fluorescence images show fluorescein accumulated in bile canaliculi.

## Supplemental figure 4

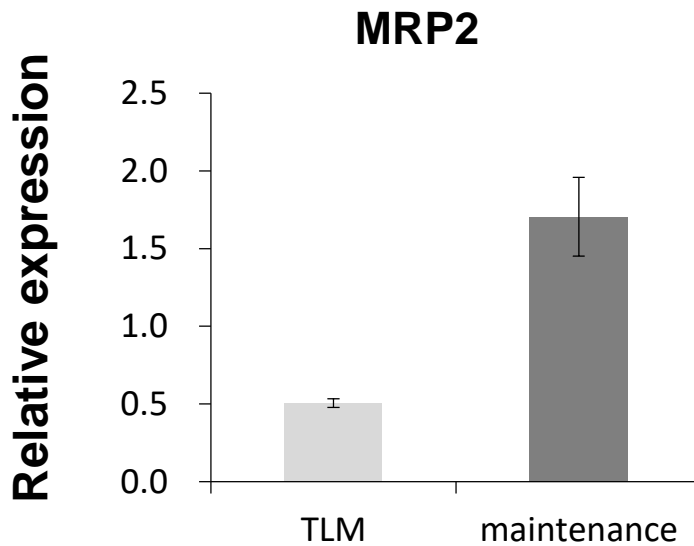

Expression of *MRP2* when hiPSC-Heps were short-term cultured in a TLM medium or maintenance medium. hiPSC-Heps were cultured in a TLM medium or maintenance medium for 4 days after a 5-day culture according to the manufacturer's protocol. The bars show the relative expression levels of *MRP2*. Pooled RNA from human liver was used for the standard curve, and the expression level was set as one. The relative expression level was calculated using the equation of the line for the standard curve. Data are presented as means  $\pm$  S.D. (n = 3).

## Supplemental figure 5

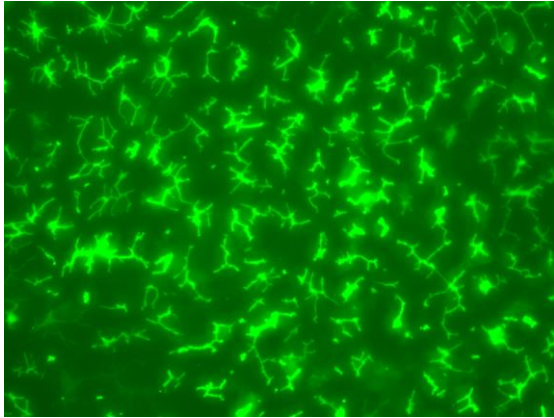

**Fluorescein**

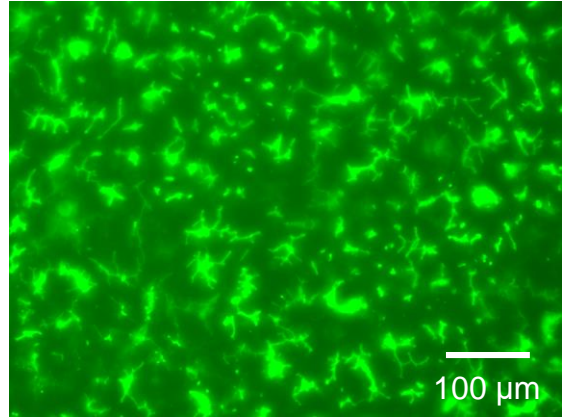

**Tauro-nor-THCA-24-DBD**

Observation of the bile canaliculi using FDA or tauro-nor-THCA-24-DBD. hiPSC-Heps were cultured in an LTM medium for 28 days and sandwich-cultured in a maintenance medium for another 7 days. The biliary efflux assay was performed using FDA or tauro-nor-THCA-24-DBD. Fluorescence images show that fluorescein or tauro-nor-THCA-24-DBD accumulated in bile canaliculi.

# Supplemental figure 6

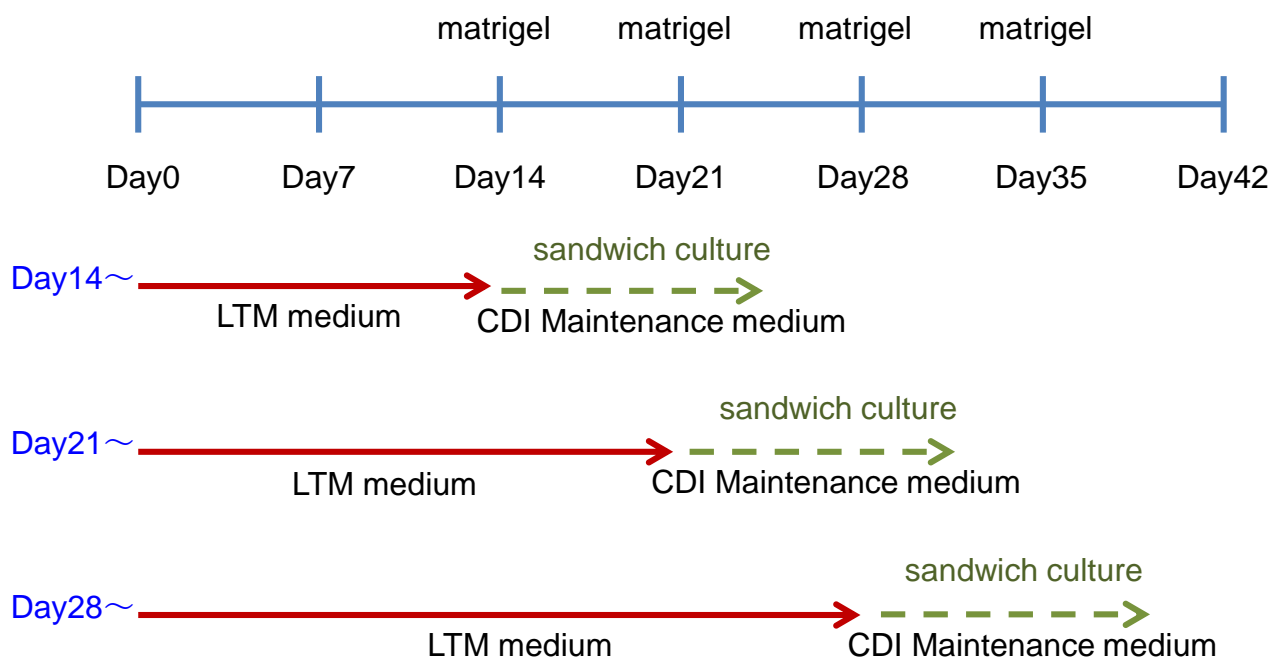

Culture schedule for the extended bile canaliculi formation using LTM medium and maintenance medium from CDI.

## Supplemental figure 7

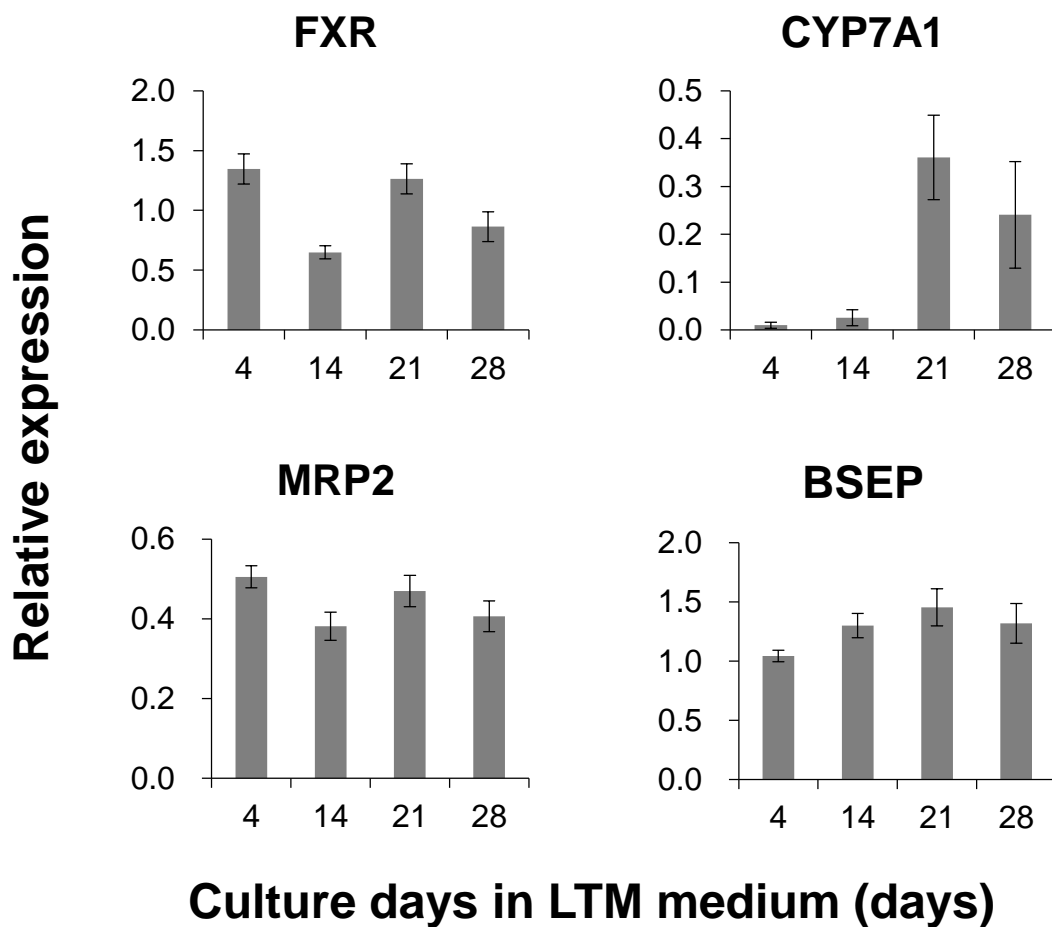

Expression of the genes related to bile acid efflux during culture in a long-term maintenance medium. The bars show the relative expression levels of *FXR*, *CYP7A1*, *MRP2*, and *BSEP*. Pooled human liver RNA was used for the standard curve, and the expression level was set as one. The relative expression level was calculated using the equation of the line for the standard curve. Data are presented as means  $\pm$  S.D. (n = 3).

## Supplemental figure 8

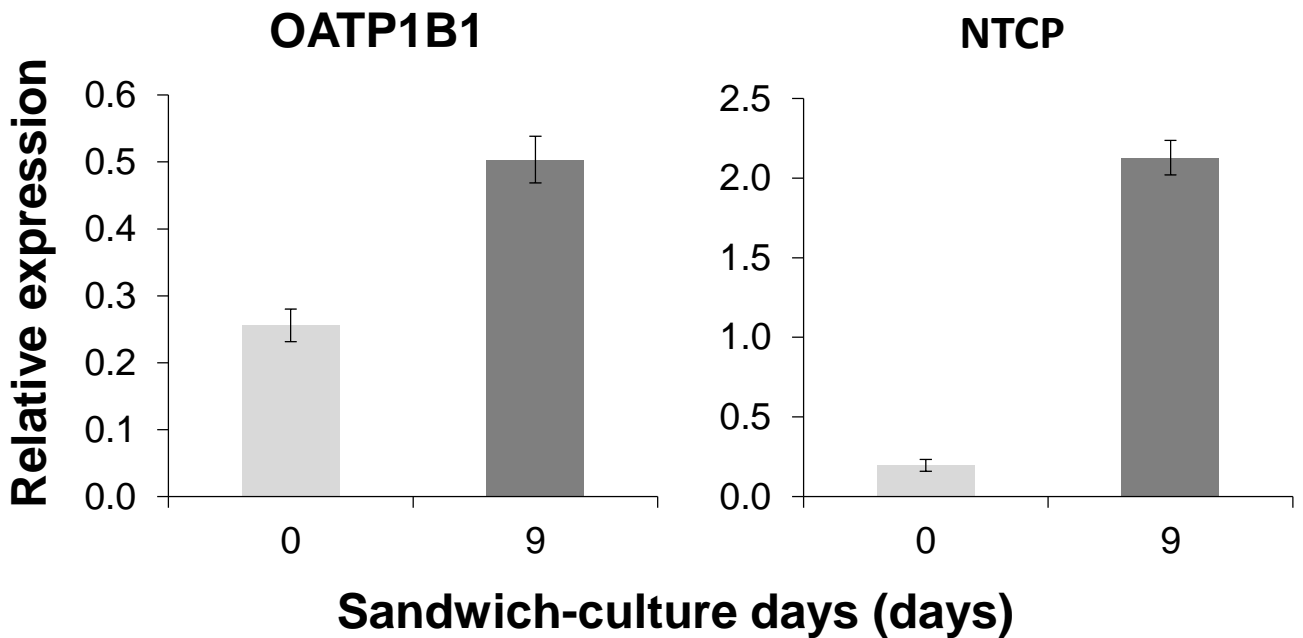

Gene expressions of *OATP1B1*, and *NTCP* when the bile canaliculi were formed. Human-induced pluripotent stem cell-derived hepatocytes were cultured in a long-term maintenance medium for 28 days and then sandwich-cultured in a maintenance medium for 9 days. The expression levels of *OATP1B1*, and *NTCP* were measured using quantitative polymerase chain reaction before and after sandwich culture. The bars show the relative expression levels *OATP1B1*, or *NTCP*. Pooled RNA from human liver was used for the standard curve, and the expression level was set as one. The relative expression level was calculated using the equation of the line for the standard curve. Data are presented as means  $\pm$  S.D. (n = 3).

## Supplemental figure 9

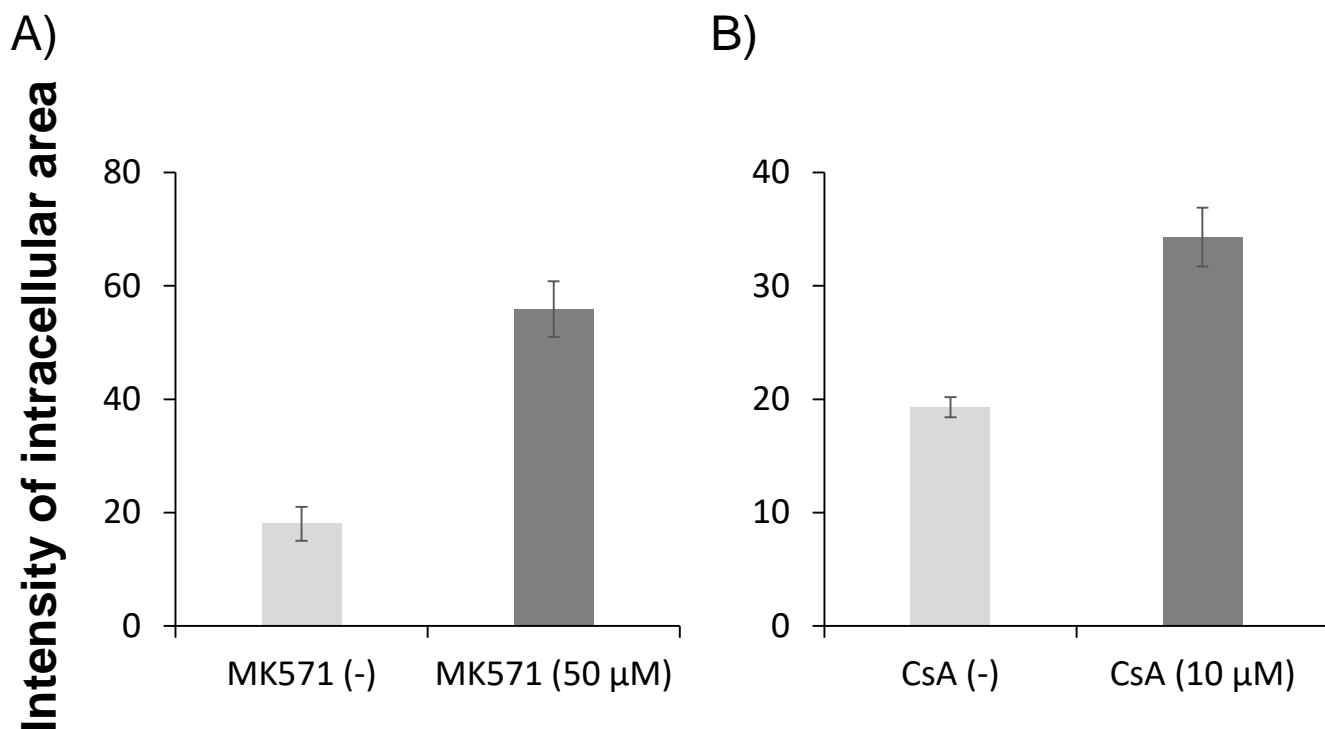

Effect of a biliary efflux transporter inhibitor on the excretion of the model substrate into bile canaliculi. Human-induced pluripotent stem cell-derived hepatocytes were cultured in a long-term maintenance medium for 28 days and then sandwich-cultured in a maintenance medium for 9 days. After that, the effect of a biliary efflux transporter inhibitor on the excretion of the model substrate into bile canaliculi was examined. Fluorescence images were taken at the same exposure time with and without inhibitor. The intensity of ten intracellular regions in the fluorescence images was measured using ImageJ (Abramoff, M., Magalhaes, P. & Ram, S. *Biophotonics Int.* **11**, 36–42 (2004)), and the average value was calculated. A) Fluorescein intensity in the intracellular area, B) tauro-nor-THCA-24-DBD intensity in the intracellular area.

## Supplemental figure 10

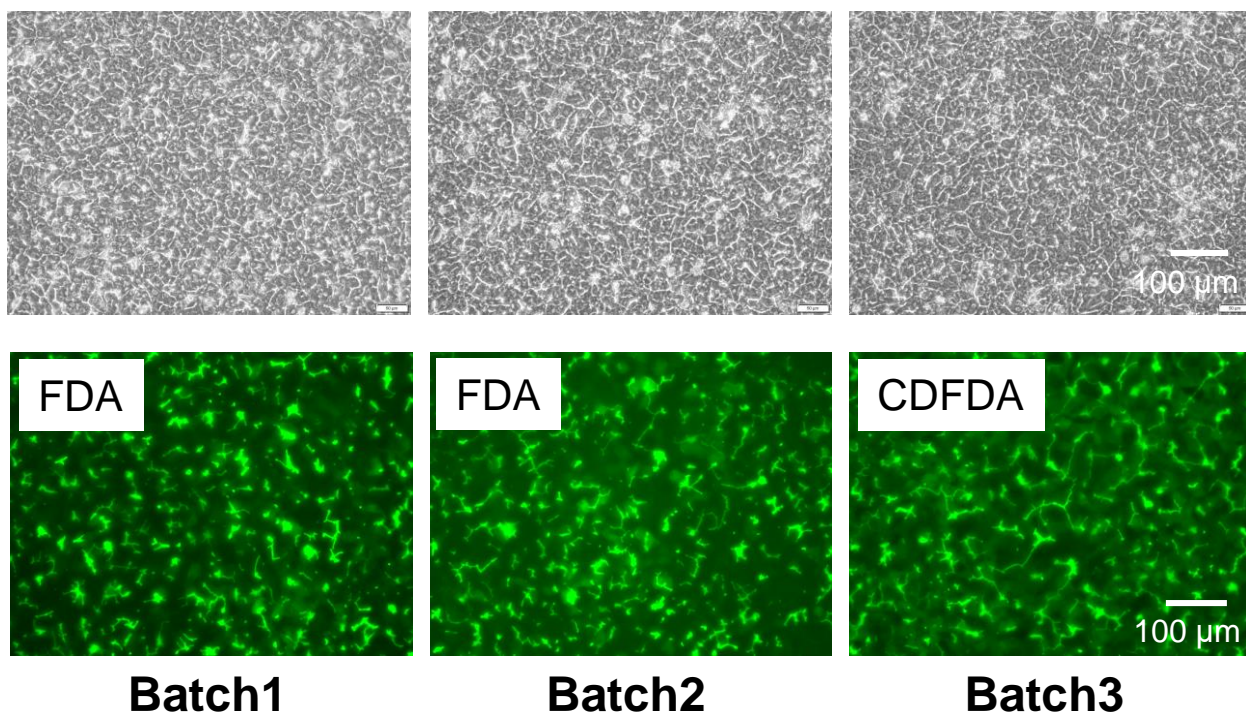

Comparison of bile canaliculi formation between batches. hiPSC-Heps were cultured in a long-term maintenance medium for 28 days and then sandwich-cultured in a maintenance medium for 9 days. Then, the biliary efflux assay was performed in each batch culture using FDA or CDFDA. Phase contrast microscope image (top) and fluorescence image (bottom). Fluorescence images show fluorescein or CDF accumulated in bile canaliculi.

## Supplemental figure 11

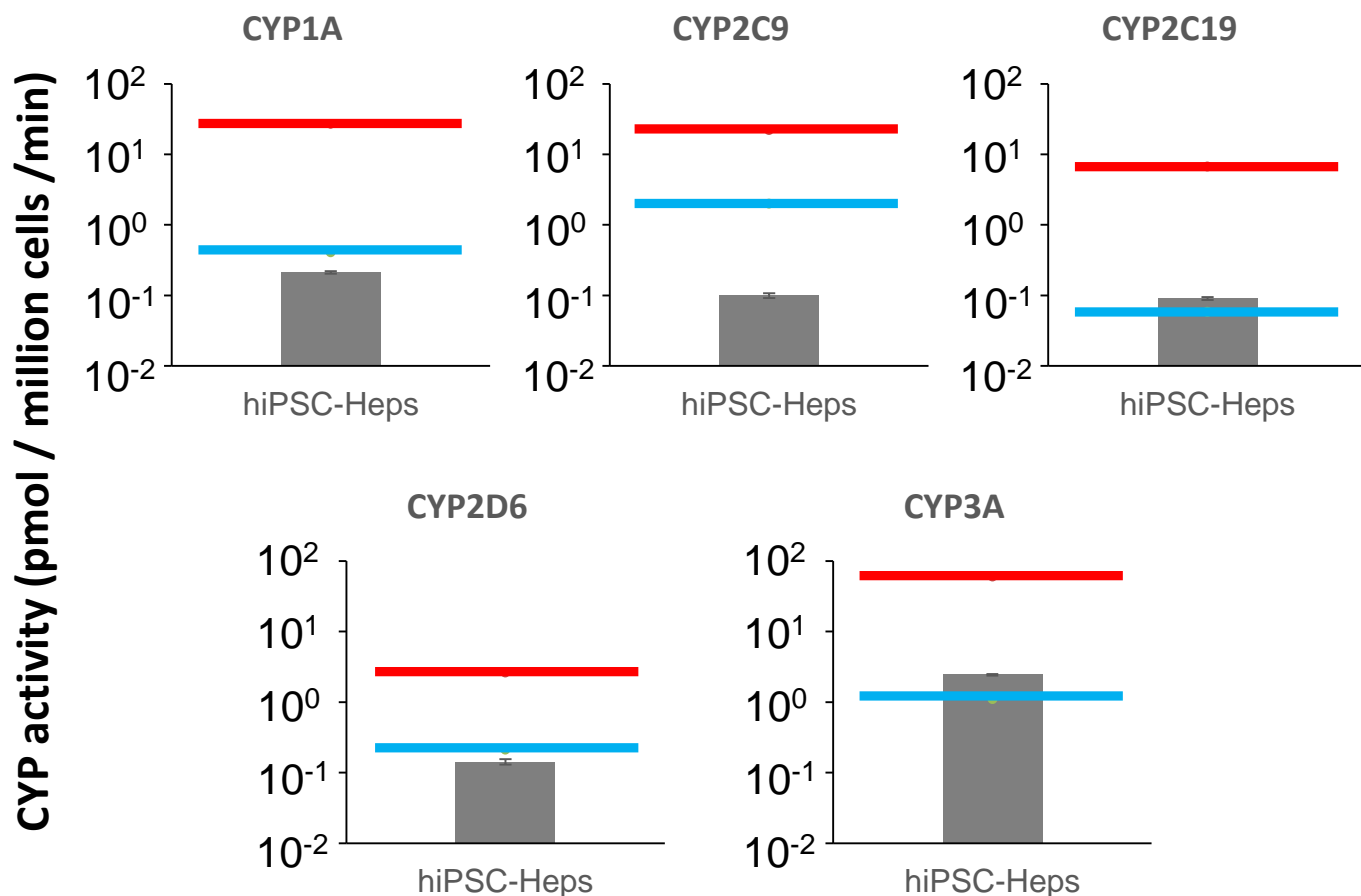

Cytochrome P450 activity when the bile canaliculi were formed. Human-induced pluripotent stem cell-derived hepatocytes were cultured in a long-term maintenance medium for 28 days and then sandwich-cultured in a maintenance medium for 9 days. Then, the metabolism test was performed. The red line shows the maximum value of activity in 8 lots of human cryopreserved hepatocytes. The blue line shows the minimum value of activity in 8 lots of human cryopreserved hepatocytes. Data are presented as means  $\pm$  S.D. (n = 3).

## Supplemental figure 12

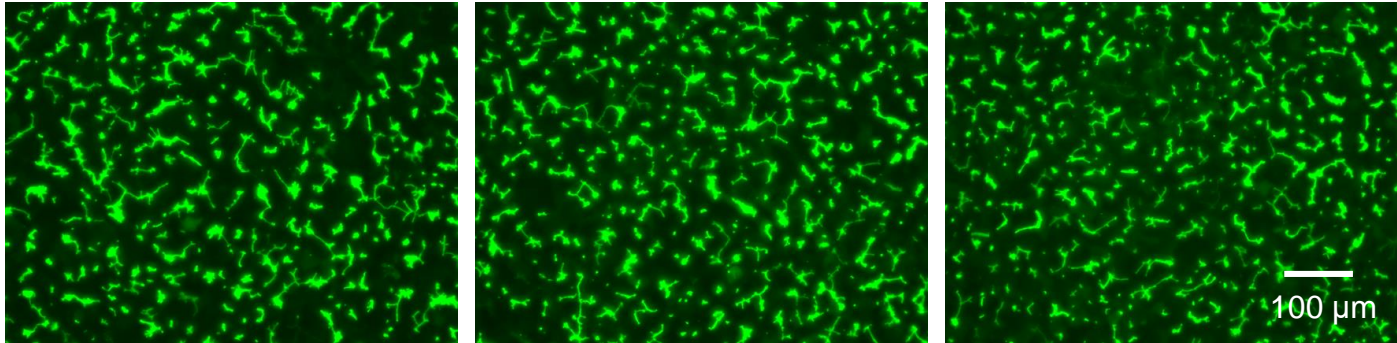

**Well 1**

**Well 2**

**Well 3**

Scale-down culture for bile canaliculi formation. hiPSC-Heps were cultured in a long-term maintenance medium for 28 days and then sandwich-cultured in a maintenance medium for 10 days on a 96-well plate. Then, the biliary efflux assay was performed in three wells. Fluorescence images show CDF accumulated in bile canaliculi.

## Supplemental figure 13

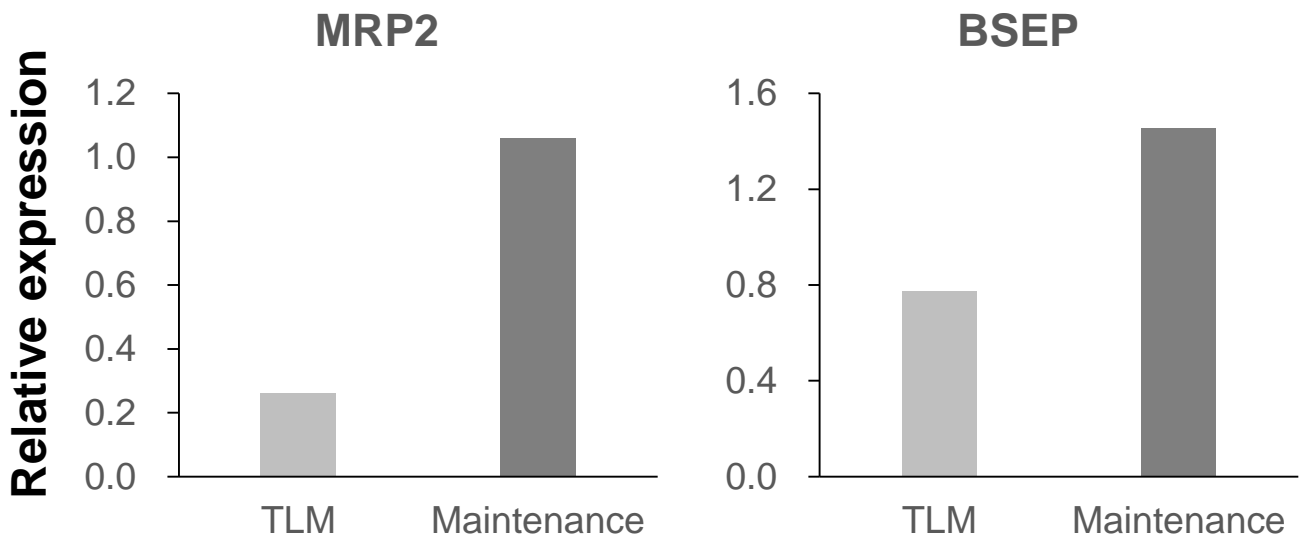

Comparison of biliary efflux transporter expression in sandwich cultures using different mediums. hiPSC-Heps were cultured in a long-term maintenance medium for 28 days and then sandwich-cultured in a long-term maintenance medium or maintenance medium for 9 days. The bars show the relative expression levels of MRP2 or BSEP after sandwich culture (n=1). Pooled RNA from human liver was used for the standard curve, and the expression level was set as one. The relative expression level was calculated using the equation of the line for the standard curve.

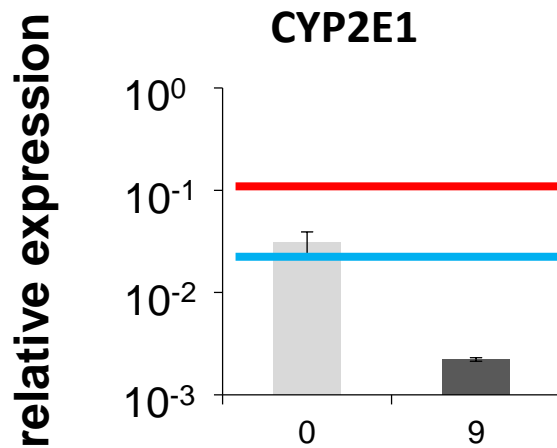

**Culture days in LTM medium (days)**

Gene expression of *CYP2E1* when the bile canaliculi were formed. Human-induced pluripotent stem cell-derived hepatocytes were cultured in a long-term maintenance medium for 28 days and then, they were sandwich-cultured in a maintenance medium for 9 days. The expression levels of major *CYPs* were measured using quantitative polymerase chain reaction before and after sandwich culture. The bar shows the relative expression levels of *CYPs*. Pooled RNA from human liver was used for the standard curve, and the expression level was set as one. The relative expression level was calculated using the equation of the line for the standard curve. The red line shows the maximum value of expression in 4 lots of human cryopreserved hepatocytes. The blue line shows the minimum value of expression in 4 lots of human cryopreserved hepatocytes. Data are presented as means  $\pm$  S.D. (n = 3).

# Supplemental table 1

## Information on human cryopreserved hepatocytes used for comparison of CYP expressions

| Vendor  | Lot               | Age | Gender | Race                 | Tobacco | Alcohol | Drug    | Infectious diseases | Medical history                                                                                            | Cause of Death              |
|---------|-------------------|-----|--------|----------------------|---------|---------|---------|---------------------|------------------------------------------------------------------------------------------------------------|-----------------------------|
|         | Lot#1             | 34  | Male   | Arabic               | No      | Yes     | No      | EBV+                |                                                                                                            | Anoxia                      |
|         | Lot#2             | 23  | Male   | Caucasian            | Yes     | Yes     | Yes     |                     |                                                                                                            | Burns                       |
|         | Lot#3             | 54  | Male   | Caucasian            | Yes     | Yes     | Yes     | EBV+                | Joint pain, Acid reflux, Kidny stones, Seasonal allergies, Lithotripsy, Cardiac cath w/ stent, MAH ATP Neg | Cardiac                     |
|         | Lot#4             | 28  | Male   | Caucasian            | Yes     | Yes     | Yes     | EBV+                | Paraplegia, Kidney/bladder infections                                                                      | ICH-Stroke                  |
|         | Lot#5             | 59  | Male   | African American     | Yes     | Yes     | Yes     | CMV+                | HTN                                                                                                        | ICH                         |
|         | (10 donor ploeed) | 33  | Male   | Caucasian            | Yes     | Yes     | Yes     | EBV+,CMV+           | Kidney Stone                                                                                               | Drug Intoxication           |
|         |                   | 54  | Male   | Caucasian            | Yes     | Yes     | Yes     | EBV+                | High cholesterol, Mcular degrenaration                                                                     | Anoxia                      |
|         |                   | 59  | Male   | Indian               | No      | Yes     | No      | CMV+                | CAD, Sten place, HTN                                                                                       | Anoxia to Crdiovascular     |
|         |                   | 48  | Male   | Caucasian            | Yes     | No      | No      | EBV+,CMV+           | HTN                                                                                                        | Anoxia to Crdiovascular     |
|         |                   | 39  | Female | Caucasian            | Yes     | Yes     | Yes     | EBV+                | HTN, Lupus, Hermatoma on kidney, Pneumonia                                                                 | CVA/Stroke to ICH           |
|         |                   | 51  | Female | Caucasian            | Yes     | Yes     | Yes     | CMV+                | Adult onset asthma, Anxiety                                                                                | CVA                         |
| VendorA |                   | 42  | Female | Caucasian            | No      | Yes     | No      | EBV+,CMV+           | Sleep apnea, HTN, ADD, Depression, Skin cancer, Gastric bypass                                             | Anoxia to Crdiovascular     |
|         |                   | 7   | Female | African American     | No      | No      | No      |                     | Tracheostomy, Systemic venous HTN, Cerebral HTN                                                            | CVA/ICH                     |
|         |                   | 46  | Female | Caucasian            | No      | Yes     | No      | CMV+                | Asthma                                                                                                     | ICH-Stroke                  |
|         | Lot#6             | 3   | Male   | Caucasian            | No      | No      | No      |                     |                                                                                                            | C-spin Injury               |
|         | (10 donor ploeed) | 51  | Male   | Caucasian            | No      | Yes     | No      |                     |                                                                                                            | Hed Trauma/Blunt Injury     |
|         |                   | 57  | Male   | Caucasian            | Yes     | Yes     | No      |                     | Alcoholic hepatitis, Aspiration pneumonia, HTN                                                             | Anoxia                      |
|         |                   | 16  | Male   | Caucasian            | No      | No      | No      |                     |                                                                                                            | Anoxia to Blunt Injury      |
|         |                   | 34  | Male   | Caucasian            | Yes     | Yes     | No      | EBV+                | Borderline hypertension                                                                                    | CVA                         |
|         |                   | 63  | Male   | Caucasian            | Yes     | Yes     | No      | EBV+,CMV+           | HTN                                                                                                        | Anoxia to Crdiovascular     |
|         |                   | 53  | Female | African American     | Yes     | Yes     | No      | EBV+,CMV+           | HTN, Laproscopic, Cholecystectomy                                                                          | CVA to ICH                  |
|         |                   | 53  | Female | Caucasian            | No      | No      | No      | EBV+,CMV+           |                                                                                                            | Anoxia                      |
|         |                   | 52  | Female | Caucasian            | No      | Yes     | Yes     | EBV+,CMV+           | HTN                                                                                                        | Anoxia,Asphyxiation Suicide |
|         |                   | 34  | Female | Caucasian            | Yes     | Yes     | Yes     | EBV+,CMV+           | Asthma                                                                                                     | Anoxia/Drug Intoxication    |
|         | Lot#1             | 44  | Female | Caucasian / Hispanic | No      | No      | No      | EBV+,CMV+           |                                                                                                            | Anoxia, CVA                 |
|         | Lot#2             | 40  | Female | Caucasian            | Yes     | Yes     | No      |                     | Asthma, epilepsy                                                                                           | CVA                         |
|         | Lot#3             | 77  | Female | Hispanic             | No      | No      | No      | CMV+                | Asthma, HTN                                                                                                | CVA 2nd to ICH              |
|         | Lot#4             | 26  | Female | Caucasian            | Yes     | Yes     | Yes     | CMV+                |                                                                                                            | GSW-Head                    |
| VendorB | (10 donor ploeed) | 21  | Female | Caucasian            | Yes     | Yes     | Yes     |                     |                                                                                                            | Anoxia-Drug Intoxication    |
|         |                   | 40  | Female | Caucasian            | Yes     | Yes     | Yes     |                     |                                                                                                            | CVA                         |
|         |                   | 55  | Male   | Caucasian            | Yes     | Yes     | No      |                     |                                                                                                            | Head Trauma                 |
|         |                   | 33  | Female | Caucasian            | Yes     | No      | No      |                     |                                                                                                            | Stroke                      |
|         | Lot#1             | 64  | Male   | Caucasian            | No      | No      |         |                     | Hepatocellular carcinoma                                                                                   |                             |
| VendorC | Lot#2             | 26  | Male   | Caucasian            | No      | No      |         |                     |                                                                                                            |                             |
|         | Lot#3             | 74  | Female | Caucasian            | No      | No      |         |                     | Adenocarcinoma from a rectosigmoid cancer                                                                  |                             |
|         | Lot#1             | 56  | Female | Caucasian            |         |         |         |                     | Duodenal neuroendocrine tumor                                                                              |                             |
| VendorD | Lot#2             | 63  | Female | Caucasian            |         |         |         |                     | Sigmoid adenocarcinoma                                                                                     |                             |
|         | Lot#3             | 25  | Female | Caucasian            |         |         |         |                     |                                                                                                            |                             |
|         | Lot#1             | 54  | Female | Caucasian            | No      | Yes     | No      | CMV+, EBV+          |                                                                                                            | Stroke                      |
|         | Lot#2             | 15  | Male   | Caucasian            | No      | No      | No      |                     |                                                                                                            | Head Trauma                 |
|         | Lot#3             | 45  | Male   | Caucasian            | No      | Yes     | Yes     |                     |                                                                                                            | Anoxia                      |
| VendorE | Lot#4             | 27  | Male   | Caucasian            | Yes     | Yes     | Unknown |                     |                                                                                                            | Heroin Overdose             |
|         | Lot#5             | 29  | Male   | Caucasian            | Yes     | Yes     | Yes     |                     |                                                                                                            | Anoxia                      |
|         | Lot#6             | 30  | Female | African American     | No      | No      | No      |                     |                                                                                                            | Cardiac Arrest              |
